# Supplementary material for: Contribution of Hydrogen Cyanide to the Antagonistic Activity of Pseudomonas Strains Against Phytophthora infestans
Source: MDPI journal article supplement (doi:10.3390/microorganisms8081144), 2020-07-28
Supplement: s1 [file s1]

## Supplementary information

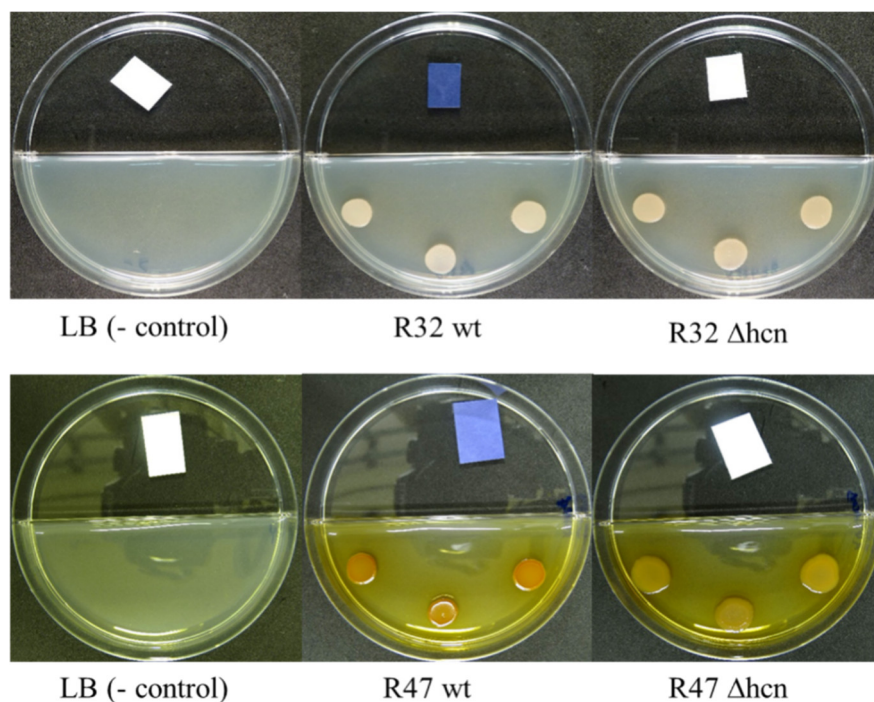

**Figure S1.** Cyanide detection assay. Bacterial strains were inoculated on v medium on one side, and detection paper was placed on the other empty side of split plate for 24 h at 30 °C. Images were taken after 24 h. Blue color represents the presence of cyanide in the surrounding. Uninoculated medium was used as control.

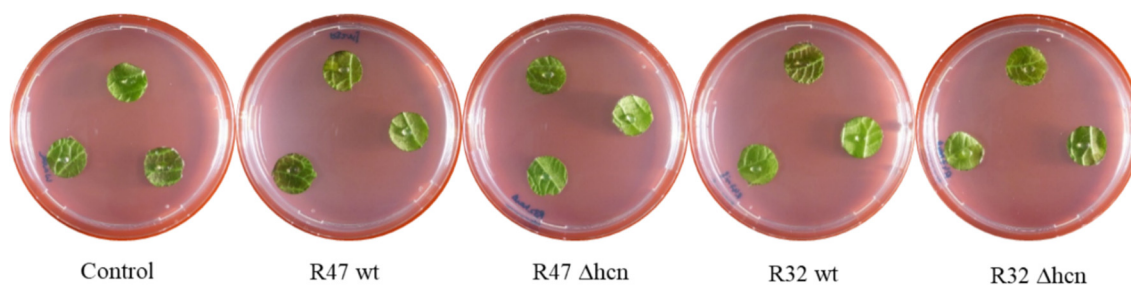

**Figure S2.** Representative images from potato leaf disc experiments where only *Pseudomonas* strains R47 (wt and  $\Delta$ hcn) and R32 (wt and  $\Delta$ hcn) were inoculated. Pictures were taken 6 days post-inoculation and incubation in humid chambers.

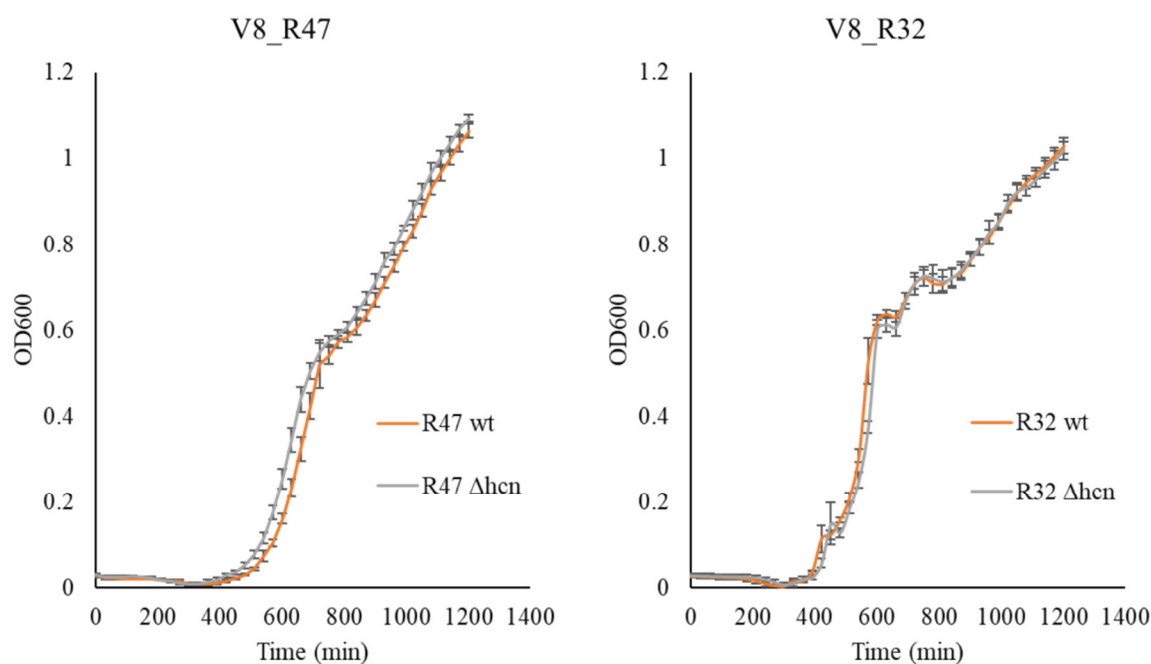

**Figure S3.** Growth curves for R47 (wt and  $\Delta hcn$ ) and R32 (wt and  $\Delta hcn$ ). Bacterial strains were grown in clarified V8 liquid medium for 20 h. Solid lines represent average of 3 replicates with corresponding error bars.

**Table S1.** Primers used in this study.

| Name    | Sequence; restriction sites (underlined) | Usage              |
|---------|------------------------------------------|--------------------|
| hcn47-1 | 5'-CGGAATTCACGTGCGCAGCCTGATCT-3'         | Fragment 1 for R47 |
| hcn47-2 | 5'-GGGGTACCGAGGGACTGGATGACGCT-3'         | Fragment 1 for R47 |
| hcn47-3 | 5'-GGGGTACCTTCCTCGCCGAGCGTTTC-3'         | Fragment 2 for R47 |
| hcn47-4 | 5'-CGGGATCCAGTCGGTGCAGATCTACTACG-3'      | Fragment 2 for R47 |
| hcn32-1 | 5'-CGGAATTCGCTGGCGTTGGTTGACAG-3'         | Fragment 1 for R32 |
| hcn32-2 | 5'-GGGGTACCGGGCTGGATATCTAGCTTTCG-3'      | Fragment 1 for R32 |
| hcn32-3 | 5'-GGGGTACCTGGCCGAGCGTTTTGACTTG-3'       | Fragment 2 for R32 |
| hcn32-4 | 5'-CGGGATCCAAGCGTTGGTGGTTGCCCTGC-3'      | Fragment 2 for R32 |

**Table S2.** Bacterial strains and plasmids used in this study.

| Strain or plasmids       | Relevant description                                                                               | Reference |
|--------------------------|----------------------------------------------------------------------------------------------------|-----------|
| pEMG                     | Kanamycin <sup>R</sup> , <i>ori</i> R6K, <i>lacZ</i> $\alpha$ , I-SceI sites                       | [1]       |
| pSW-2                    | Gentamycin <sup>R</sup> , <i>ori</i> RK2, I-sce I                                                  | [1]       |
| pEMG:: $\Delta hcn$ _R47 | pEMG plasmid containing 1 kb fragment 1-fragment 2 EcoRI-BamHI insert from R47 for deleting hcnABC | This work |
| pEMG:: $\Delta hcn$ _R32 | pEMG plasmid containing 1 kb fragment 1-fragment 2 EcoRI-BamHI insert from R32 for deleting hcnABC | This work |
| R47 wild-type            | wild-type                                                                                          | [2]       |
| R32 wild-type            | wild-type                                                                                          | [2]       |
| R47 pEMG:: $\Delta hcn$  | wild-type strain with pEMG::delhcnR47 plasmid, kmR                                                 | This work |
| R32 pEMG:: $\Delta hcn$  | wild-type strain with pEMG::delhcnR32 plasmid, kmR                                                 | This work |
| R47 $\Delta hcn$         | $\Delta hcn$ in-frame deletion mutant of R47 wild-type                                             | This work |

**References**

1. Martínez-García, E.; de Lorenzo, V. Engineering multiple genomic deletions in Gram-negative bacteria: Analysis of the multi-resistant antibiotic profile of *Pseudomonas putida* KT2440. *Environ. Microbiol.* **2011**, doi:10.1111/j.1462-2920.2011.02538.x.
2. Hunziker, L.; Bönisch, D.; Groenhagen, U.; Bailly, A.; Schulz, S.; Weisskopf, L. *Pseudomonas* strains naturally associated with potato plants produce volatiles with high potential for inhibition of *Phytophthora infestans*. *Appl. Environ. Microbiol.* **2015**, *81*, 821–830, doi:10.1128/AEM.02999-14.
